# Supplementary material for: Cybersecurity Risk Assessment: A Systematic Mapping Review, Proposal, and Validation
Source: MDPI journal article supplement (doi:10.3390/app13010395), 2022-12-28
Supplement: s1 [file s1]

# Cybersecurity Risk Assessment Model (TARAMCyber)

## Additional information

Isaac D. Sánchez-García, Jezreel Mejía, Tomás San Feliu and Mirna A. Muñoz

### Section I: Demographic results

1.- What is the name of your organization?

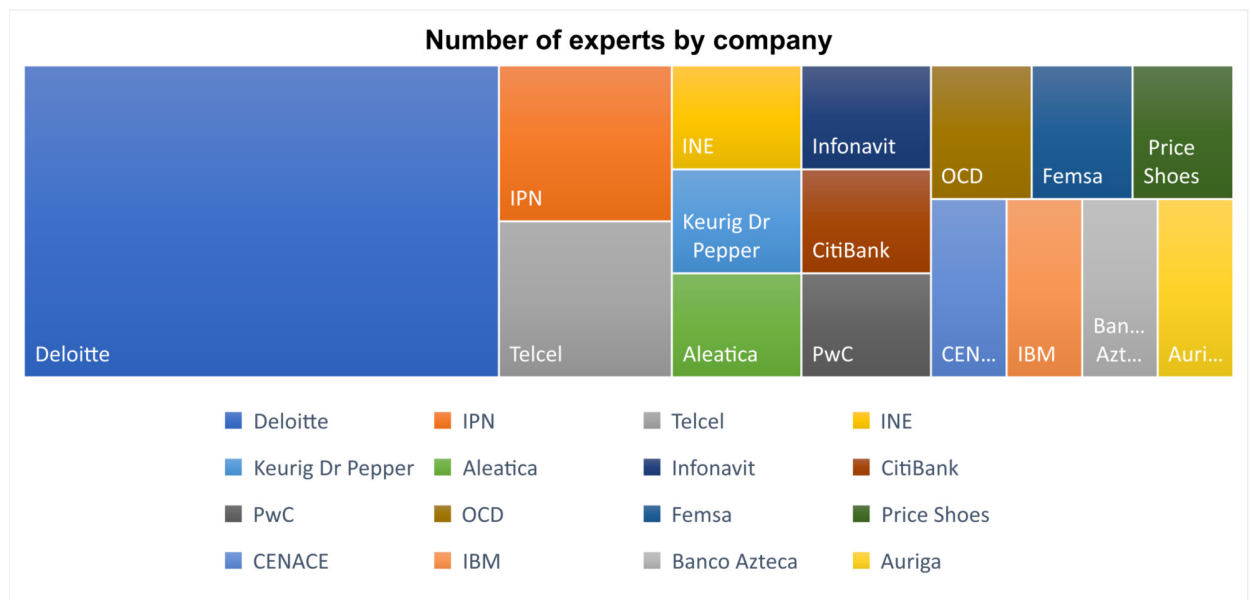

2.- What is the size of your organization?

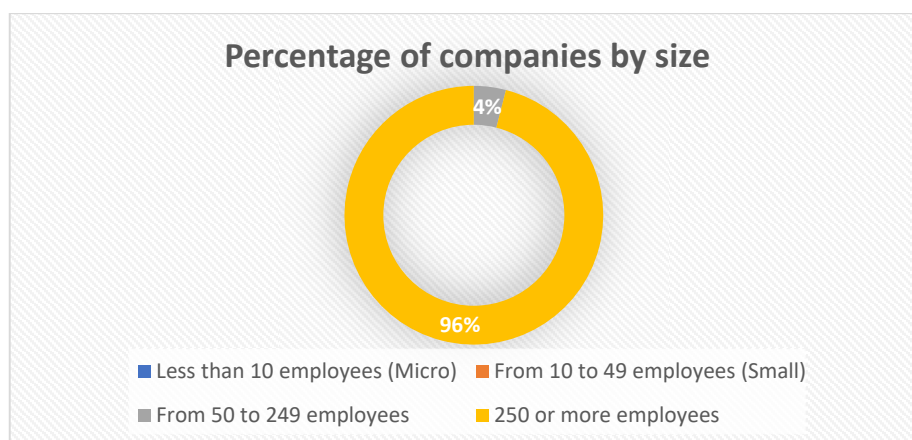

3.-What is the country where you work?

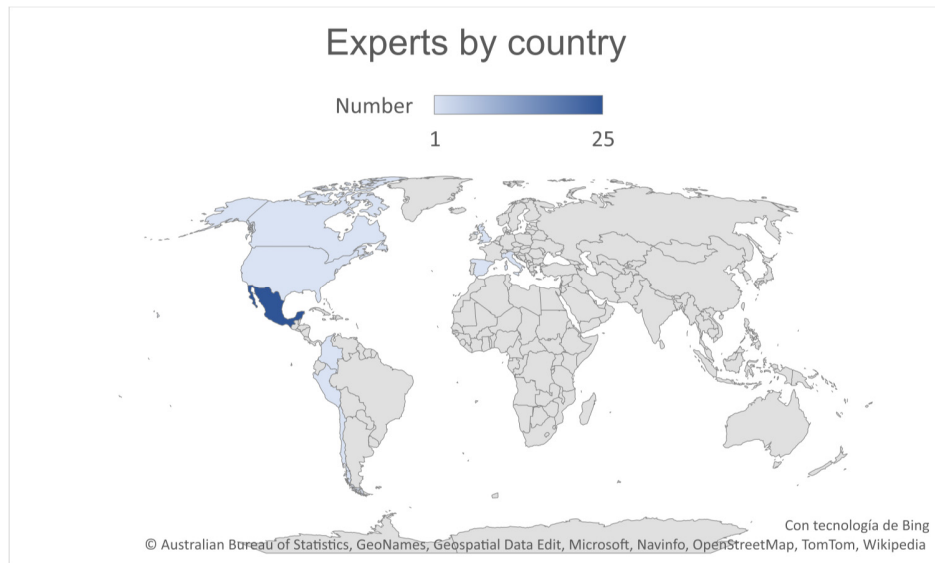

4.-Which industry is your organization primarily in?

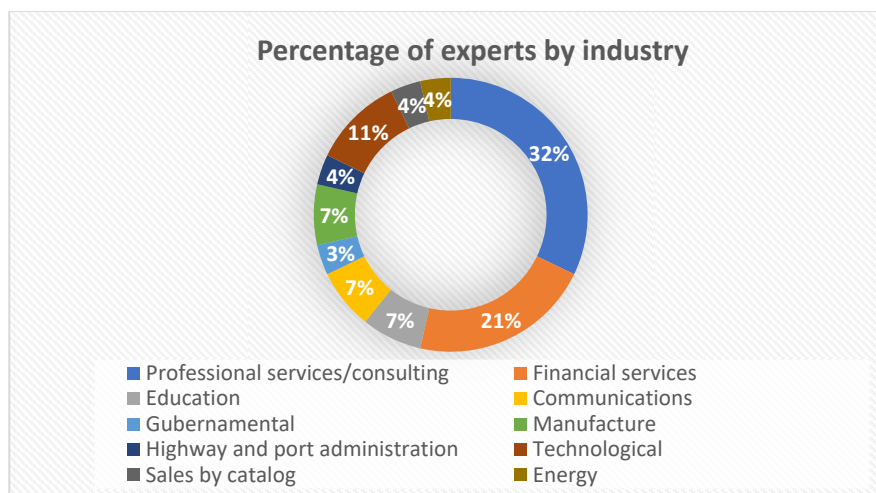

5.- At which cybersecurity maturity level would you classify your organization?

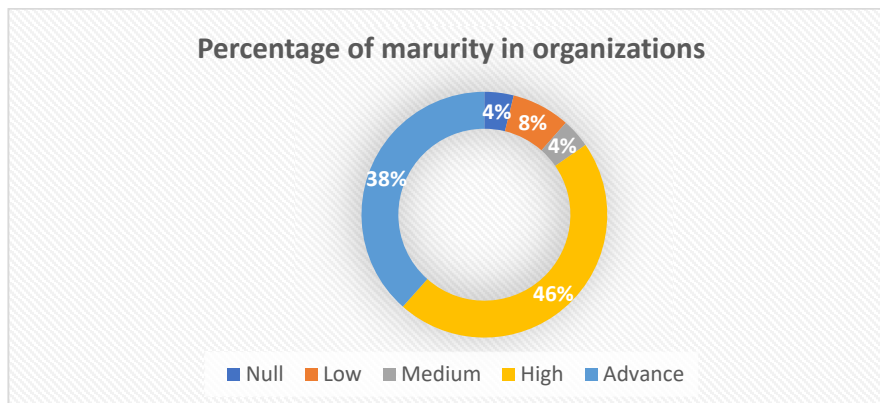

6.-What is your current position?

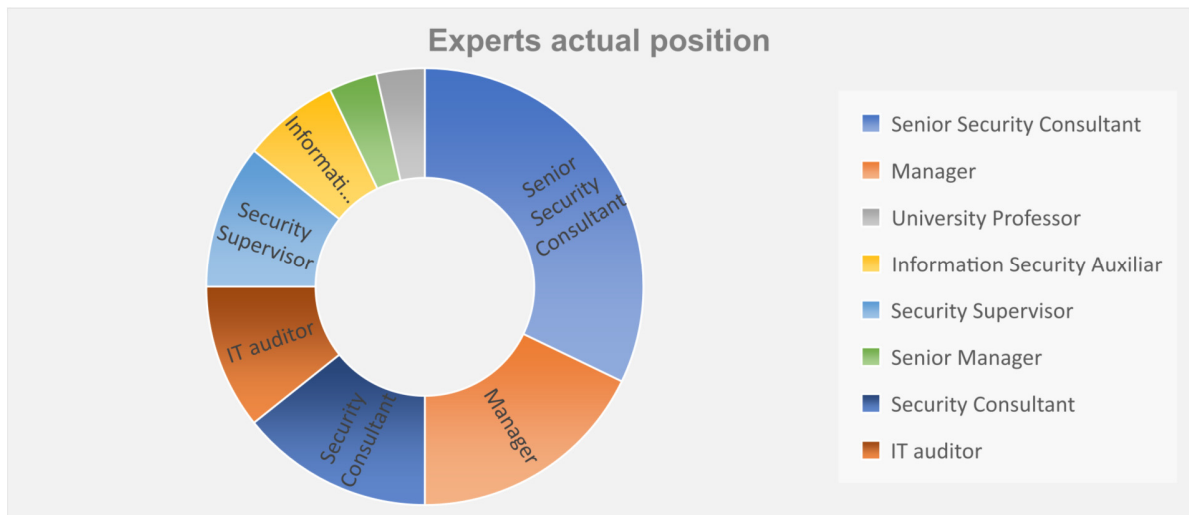

7.- How many years of experience do you have in information security or cybersecurity?

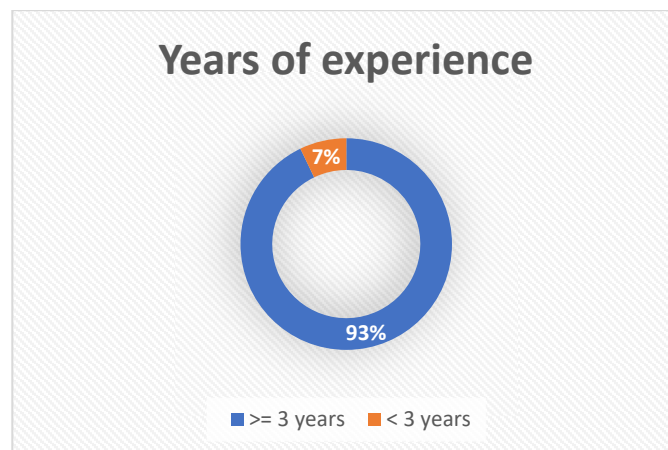

8.- Do you have information security or cybersecurity certifications?

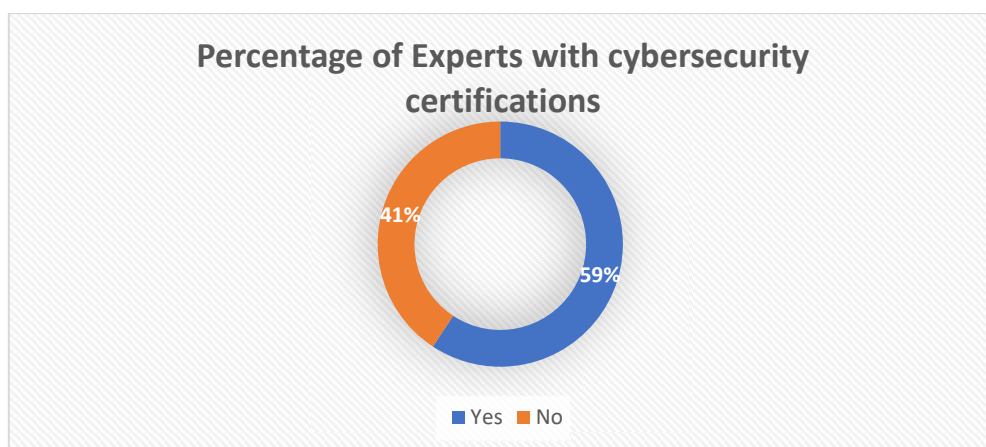

## Section II: Risk management practices

9.- Indicate which of the following risk management models you are familiar with or have used

- NIST 800-30
- ISO 27001
- NIST CSF
- COBIT
- MITRE
- PCI-DSS
- IEC standards
- NIST 800-82
- Grund-schutzmanual
- Other

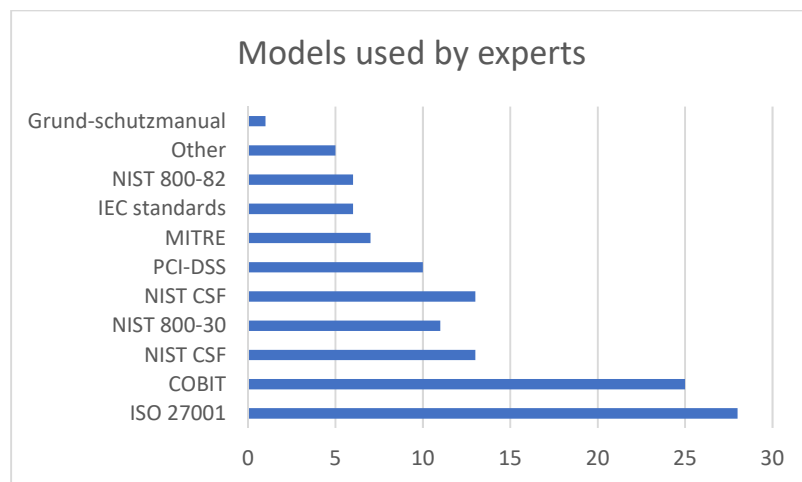

10.- Indicate which of the following risk management models you are familiar with or have used

- NIST 800-30
- ISO 27001
- NIST CSF
- COBIT
- MITRE
- PCI-DSS
- IEC standards
- NIST 800-82
- Grund-schutzmanual
- Independent model
- There is no ISMS in the organization

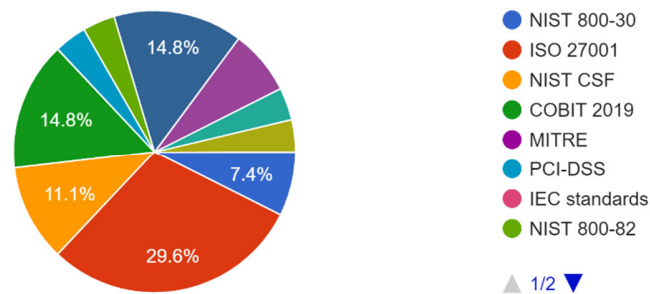

11.- Indicate according to your perspective what is the relevance of each sub-step of risk management?

- Asset identification
- Threat identification
- Identification of vulnerabilities
- Identification of impact and probability
- Identification of countermeasures and calculation of residual risk

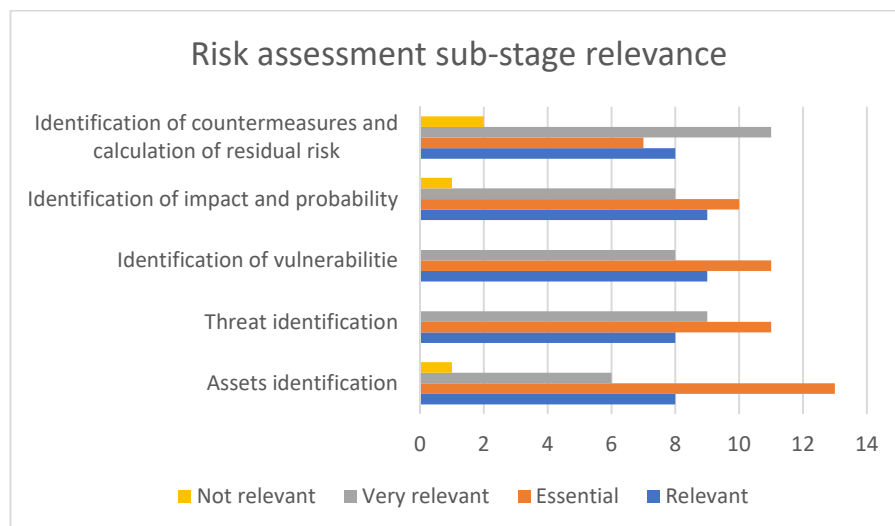

12.- What type of risk calculation do you prefer in a risk assessment model?

- Qualitative
- Quantitative

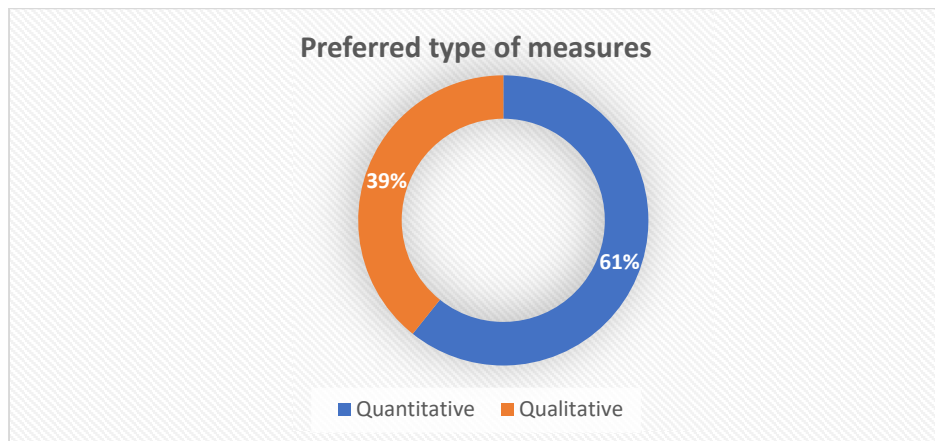

13.- Add a comment justifying your previous answer

Open answers

14.- Do you or would you use a tool to automate the risk assessment process?

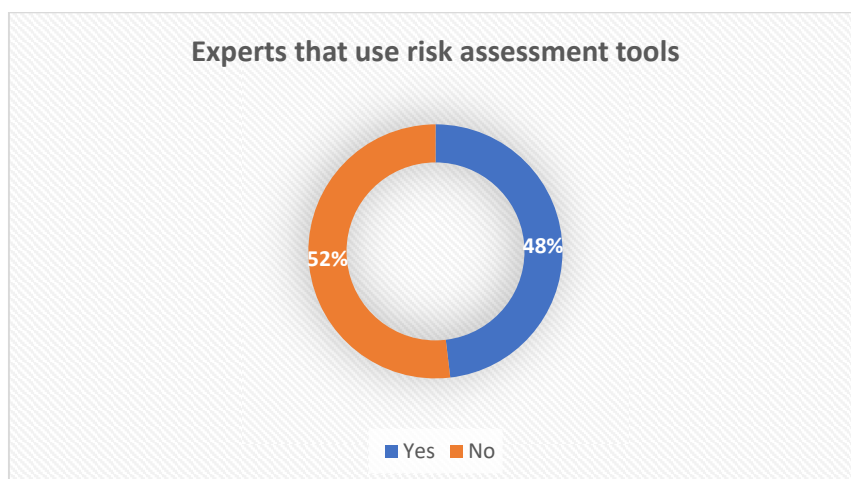

15.- If the above answer is "Yes", please mention which tool you use or would use in your organization.

Open answers

### Section III: Comments on Risk Assessment Variables

#### Identification and evaluation of assets

16.- Do you consider it important to identify the economic value of assets?

**Do you consider it important to identify the economic value of assets?**

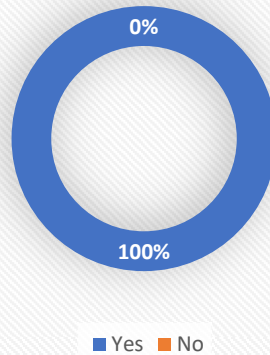

17.- Does your organization identify the economic value of assets?

**Does your organization identify the economic value of assets?**

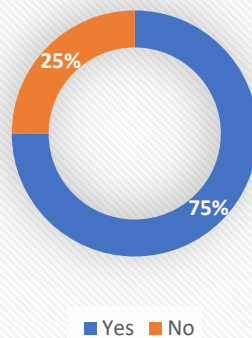

18.- Do you consider that the value of the information contained in the asset and its relevance in the process helps to know the monetary value of the asset?

**RELEVANCE OF THE MOENTARY VALUE OF INFORMATION**

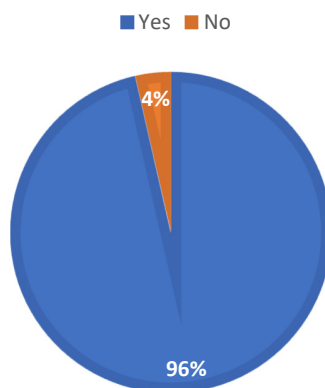

## Identification and evaluation of vulnerabilities

19.- Do you consider it important to measure the impact of vulnerability?

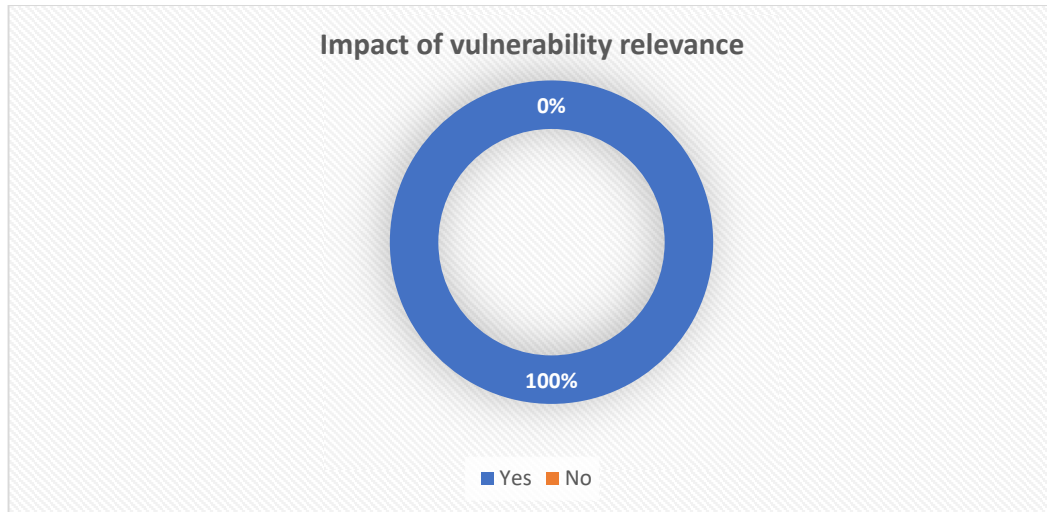

20.- Does your organization use impact metrics for Information Availability, Integrity and Confidentiality?

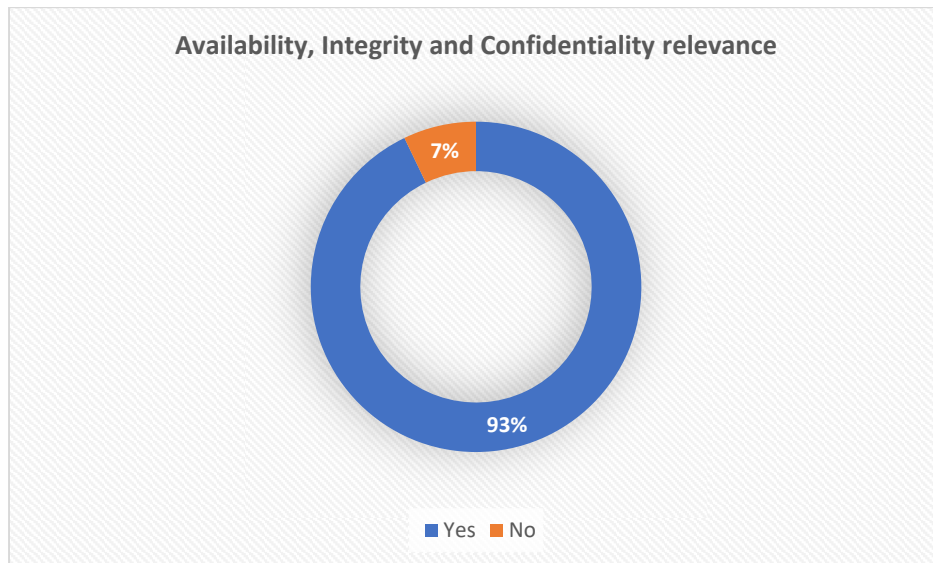

21.- NIST has a vulnerability assessment tool (URL: <https://nvd.nist.gov/vuln-metrics/cvss/v3-calculator>) Do you consider the method of identification and evaluation of vulnerabilities proposed by NIST to be appropriate?



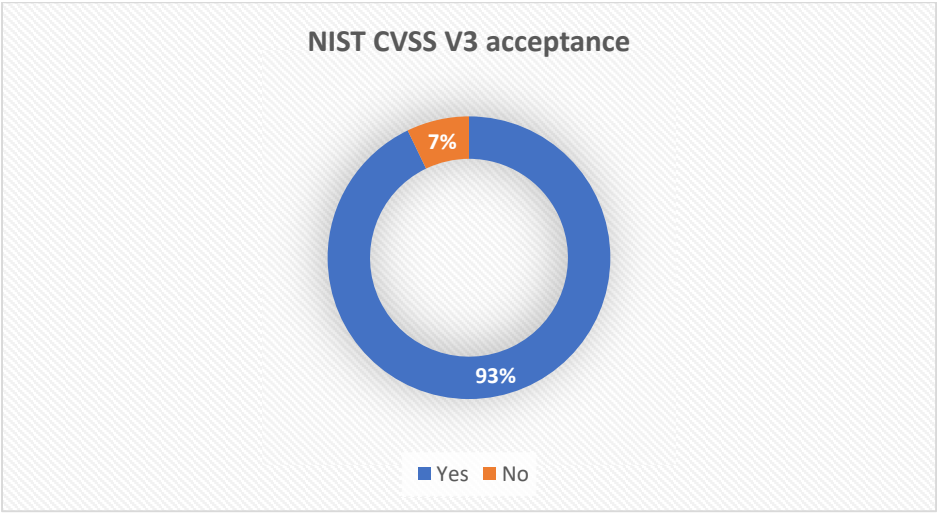

22.- Do you consider it important to identify exposure to possible "exploits" when calculating vulnerabilities?

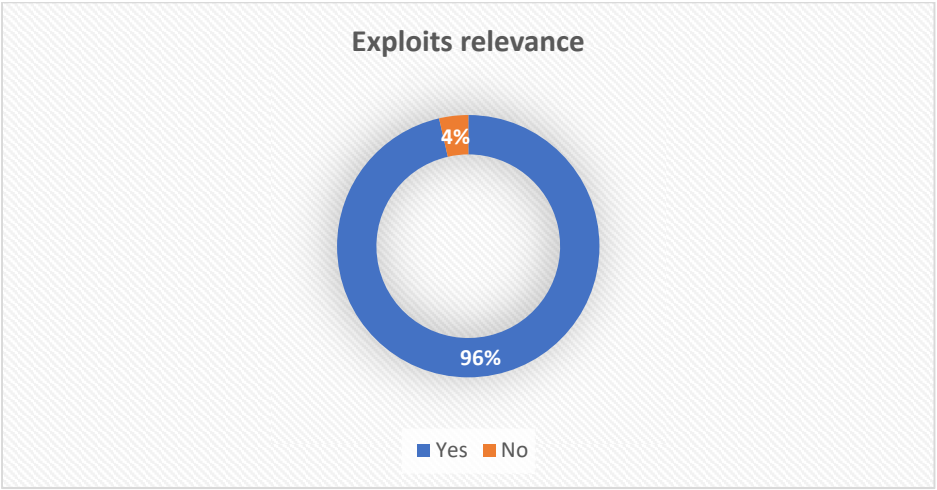

23.- Does your organization use impact metrics for Information Availability, Integrity and Confidentiality?

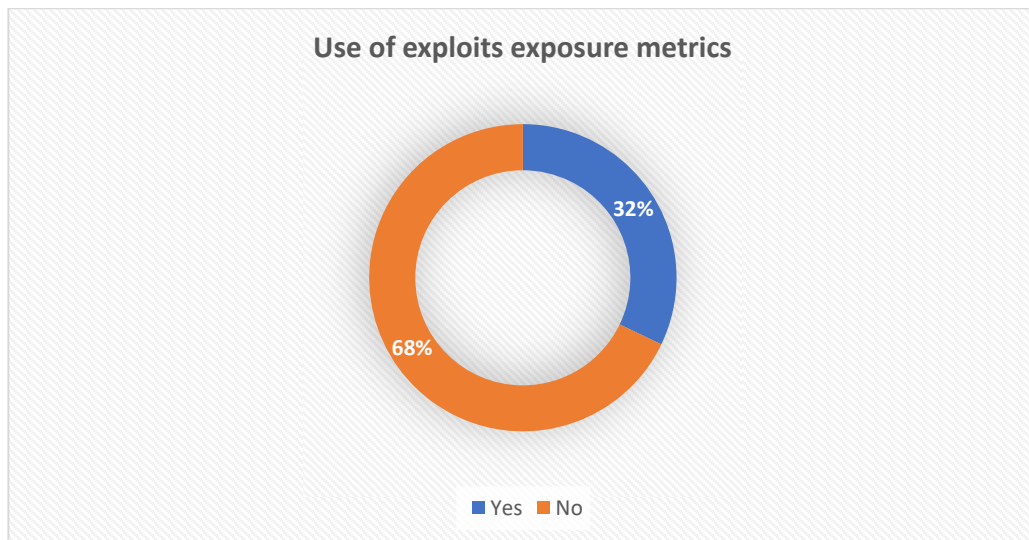

24.- What method do you use to identify and/or quantify exploits and potential vulnerabilities?

Open answer

#### **Threat identification**

25.- Do you consider it important to know the number of incidents that have been reported related to an information asset?

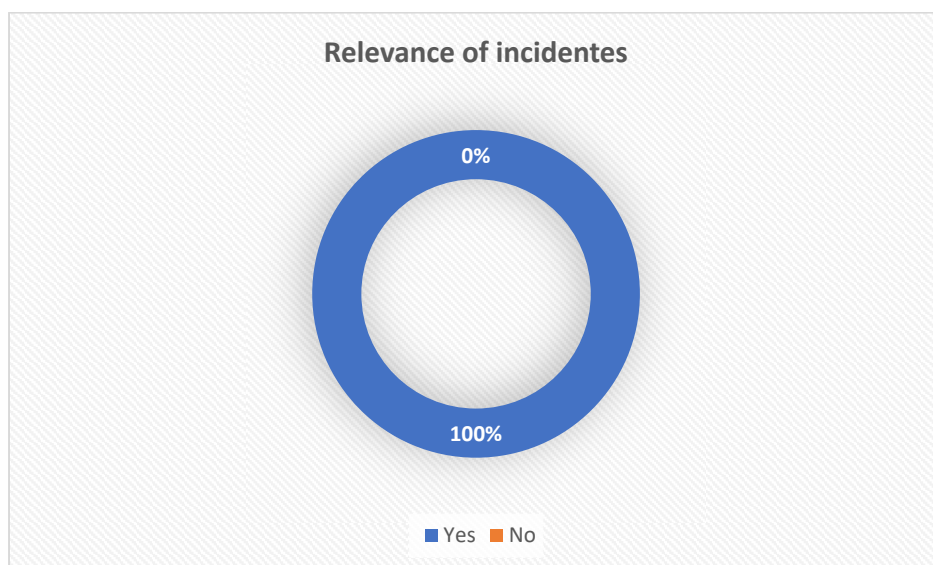

26.- Does your organization use metrics related to the number of reported incidents related to an asset?

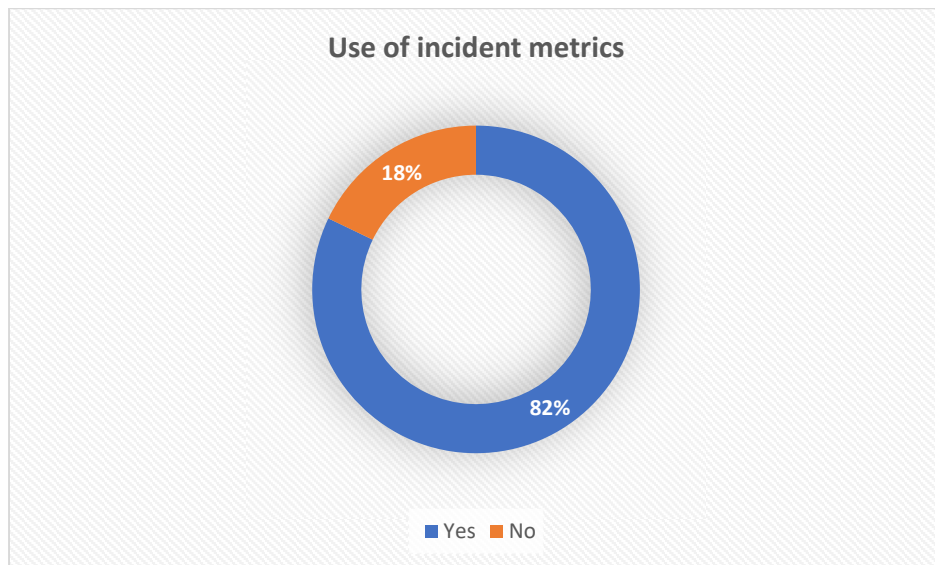

#### Impact

27.- Do you consider relevant the identification of percentages of loss of an asset in the event of an attack?

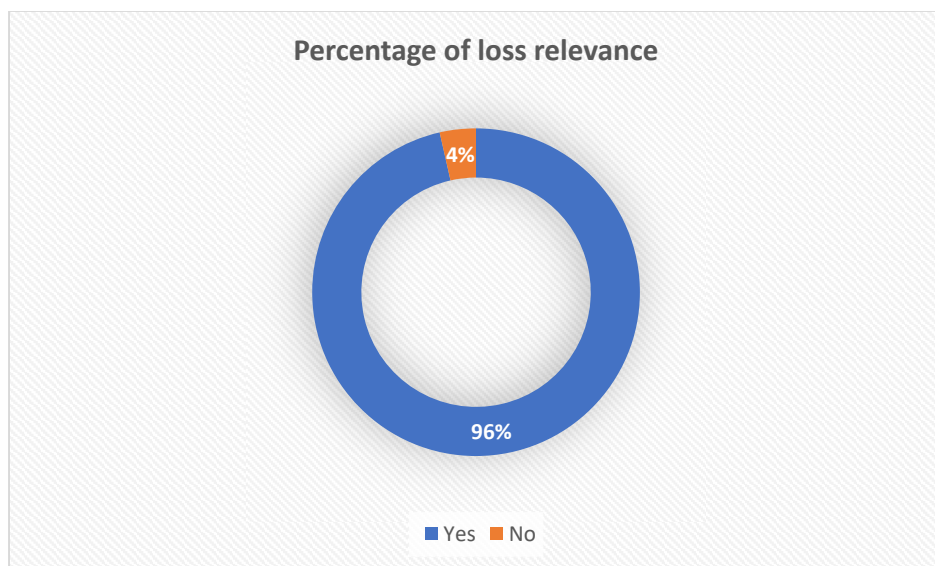

28.- Does your organization use any metrics to quantify the percentage of loss from a possible attack on an asset?

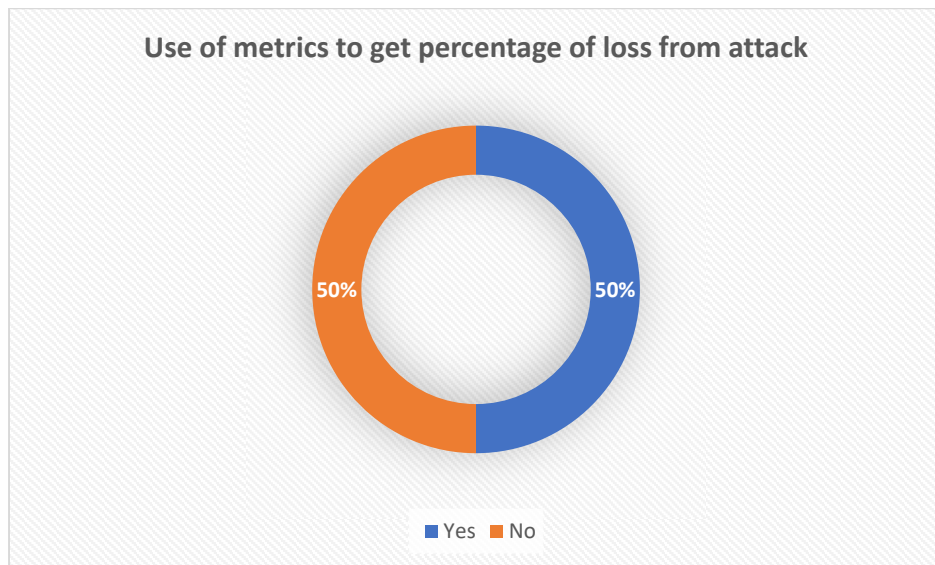

29.- What model do you use to calculate the impact of an attack?

Open answer

**Likelihood**

30.- Do you consider it important to identify the number of occurrences of security events?

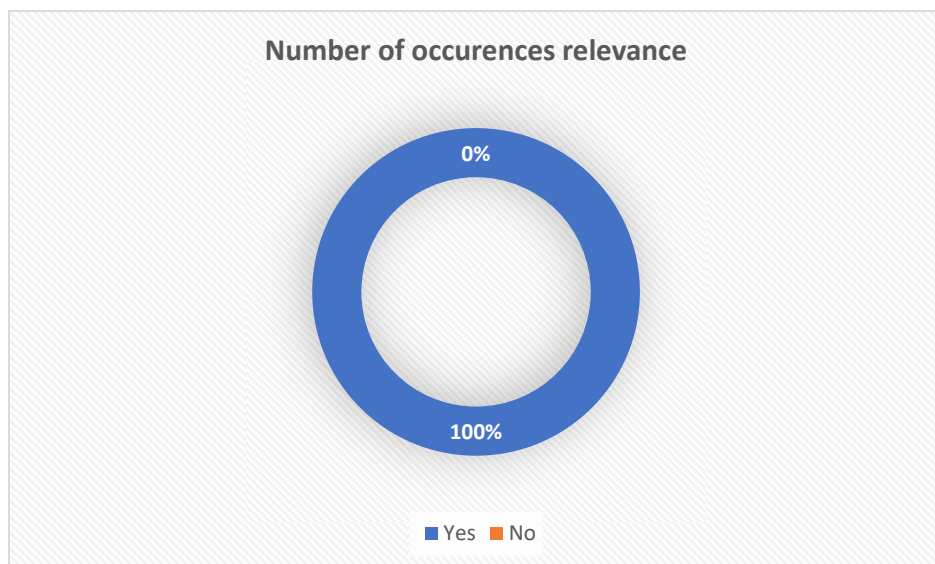

31.- Does your organization use any metrics to measure the number of occurrences of security incidents?

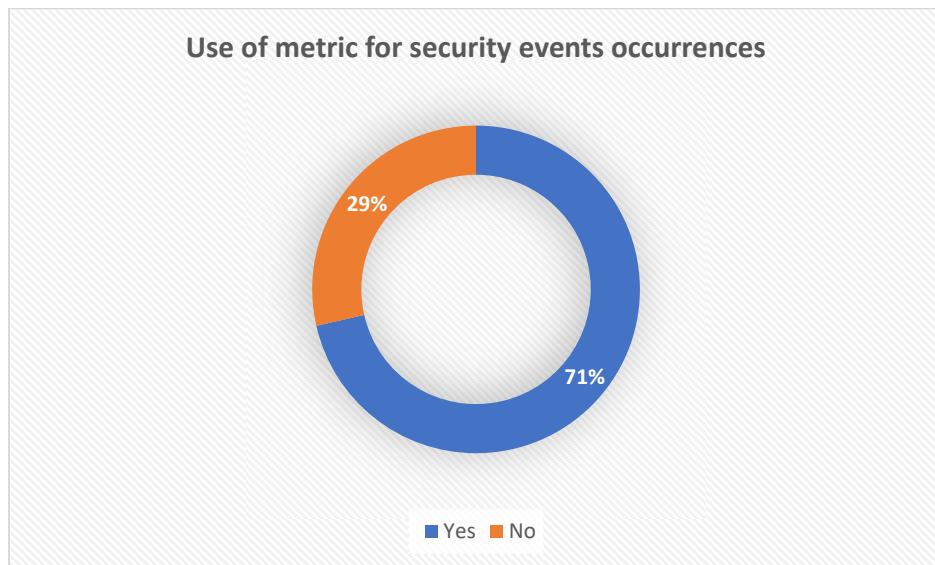

32.- What method do you use to calculate the risk probability?

Open answer

33.- Do you consider the relationship (Number of occurrences/years recorded) adequate to measure the probability of an event?

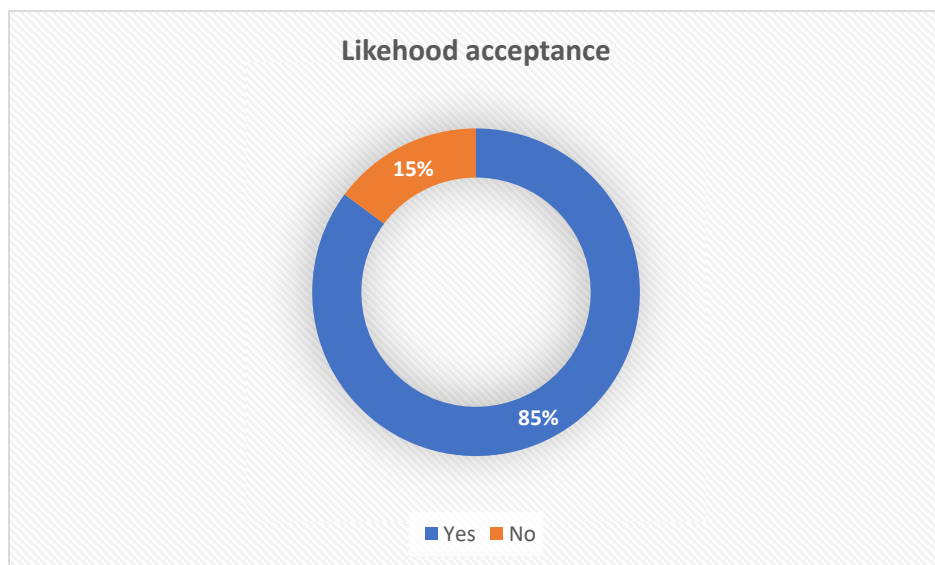

#### **Risk reduction**

34.- Do you consider it important to identify the effectiveness of a control/countermeasure?

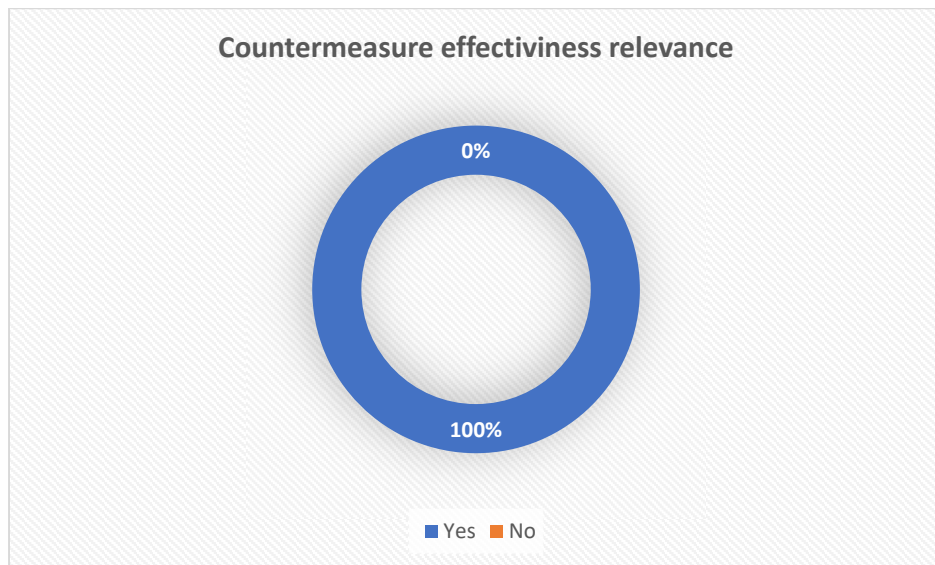

35.- Does your organization use metrics to measure the effectiveness of a control/countermeasure?

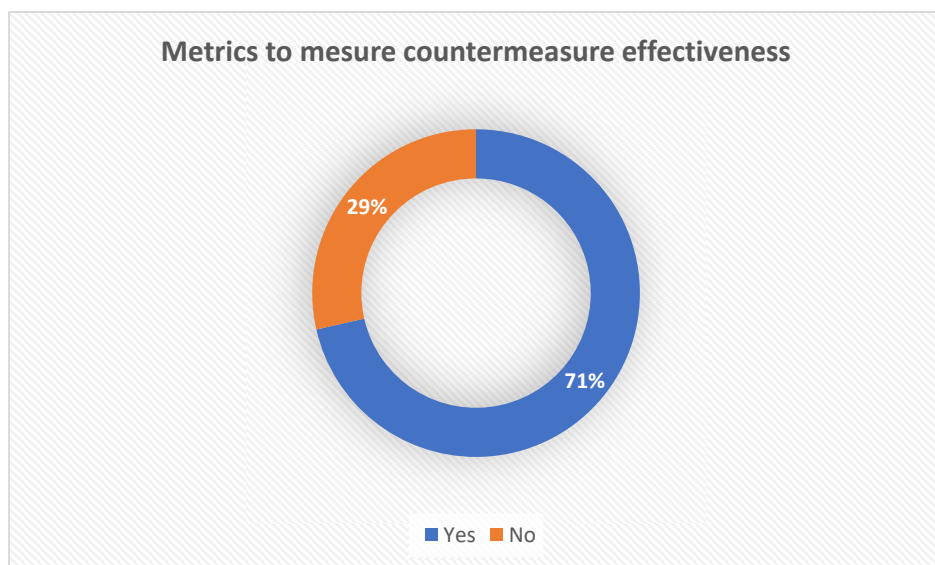

36.- What metrics do you use to measure the effectiveness of a control/countermeasure?

Open answer

37.- Do you consider it important to calculate the residual risk after applying a control/countermeasure?

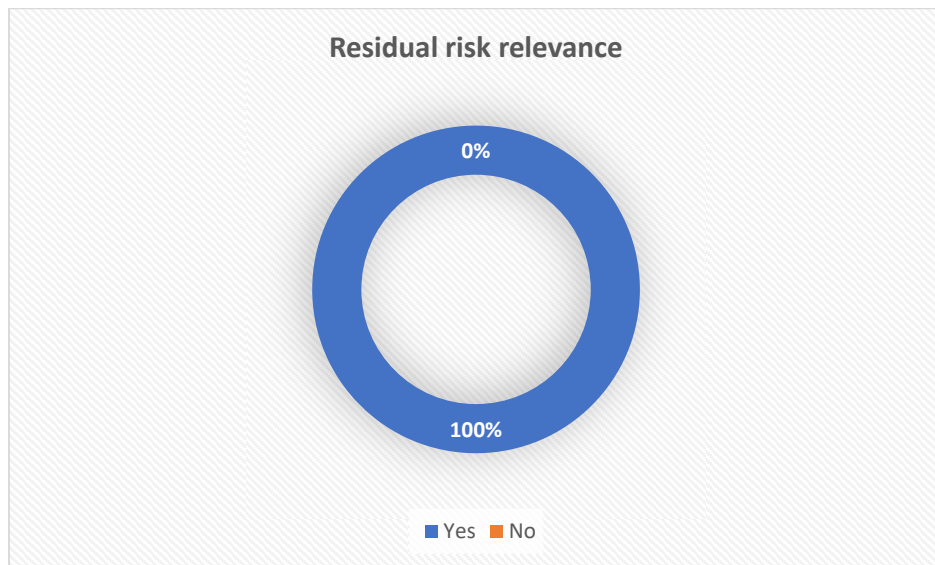

38.- Do you consider the ratio of the difference in impact before and after applying the control/countermeasure adequate to measure the effectiveness of a countermeasure?

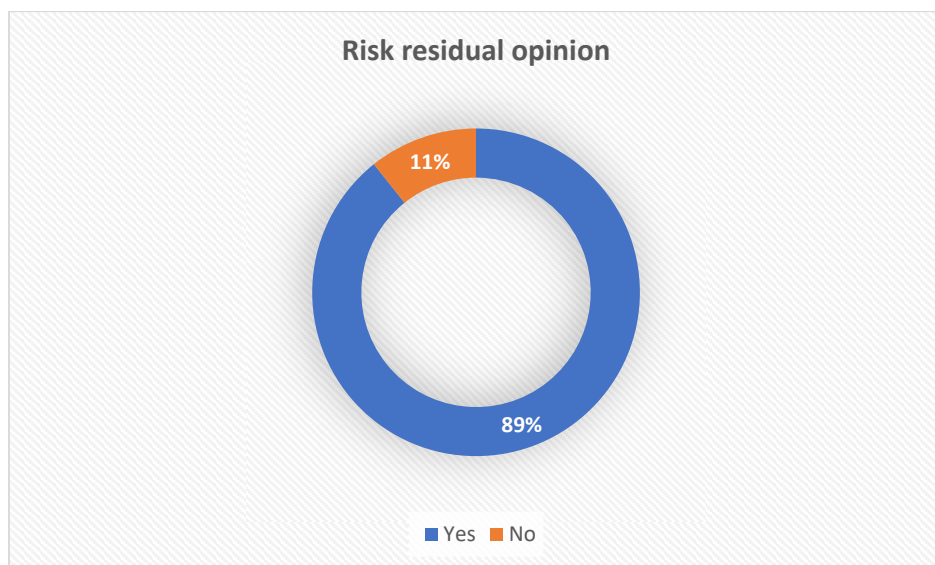

39.- How often does your organization measure residual risk?

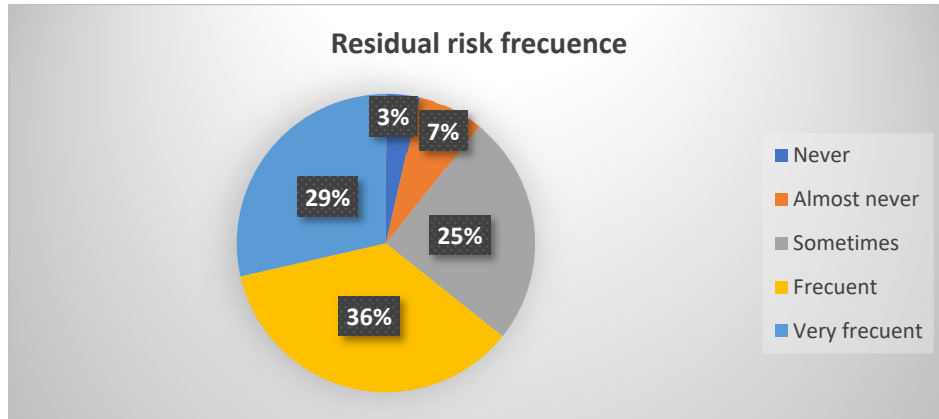

#### Section IV Evaluation of the model proposal

This section will ask questions about the proposed risk assessment model.

40.- Do you consider the relationships proposed for the qualitative and quantitative models adequate?

Table IV.- Variables summarizing

| Variables                                                         | Qualitative Proposal                                                                                                        | Quantitative proposal                                                         |
|-------------------------------------------------------------------|-----------------------------------------------------------------------------------------------------------------------------|-------------------------------------------------------------------------------|
| Relevance of the asset in the process (RAP)                       | Defined by the owner of the asset                                                                                           | RAP Low =1, RAP Medium =2, RAP High = 3                                       |
| Monetary value of the asset in dollars (MVA)                      |                                                                                                                             | Proposed by the owner of the asset                                            |
| Value of the information contained in the asset in dollars (VICA) |                                                                                                                             | Proposed by the owner of the asset                                            |
| Economic value of the asset (EVA)                                 | $EVA = RAP$                                                                                                                 | $EVA = (MVA + VICA) * RA^P$                                                   |
| Value of vulnerabilities (V)                                      | NIST algorithm CVSS:<br>"Low" = (0-3.9)<br>"Medium" = (4 -6.9)<br>"High" = (7 to 10)                                        | V= CVSS quantitative version                                                  |
| Countermeasure Maturity (CM)                                      | Low: Change or not effective<br>Low: (0-3) times effective<br>Medium: (4-8) times effective<br>High: (9-10) times effective | CM = number of times the control/countermeasure has been effective (max. 10). |
| Countermeasure effectiveness (CE)                                 | $CE = CM$                                                                                                                   | $CE = (IM_{t-1} - IM_t) * CM$                                                 |
| Asset Exposure (AE)                                               | CM and V Related by table                                                                                                   | Percentage measure defined by the SANS institute model                        |
| Information available on the asset (AAI)                          | "Low" = Incidents <1 per year<br>"Medium" =Incidents >1, <2 per year<br>"High" = Incidents > 2 per year                     | Number of incidents published per year                                        |
| Threat value (T)                                                  | AAI and V Related by table                                                                                                  | $T = [(V + AAI)/2] * EVA$                                                     |
| Number of occurrences (ON)                                        | Low: 1 to 4 incidents per year<br>Medium: 5 to 9 incidents per year<br>High: 10 incidents or more per year                  | Number of negative events related to the asset with public information.       |
| Registered years (YR)                                             |                                                                                                                             | Years of existence of the asset                                               |
| likelihood (ARO)                                                  | $ARO = ON$                                                                                                                  | $ARO = \frac{ON}{YR}$                                                         |



|                             |                                                          |                                               |
|-----------------------------|----------------------------------------------------------|-----------------------------------------------|
| Impact (IM)                 | T and AE Related by table                                | $IM = T * AE$                                 |
| Risk exposure value (R)     | IM and ARO Related by table                              | $R_1 = IM * ARO$<br>$R_2 = [(T/EVA) * ARO]/2$ |
| Acceptable risk value (ARV) | Value of the risk immediately lower than the current one | Defined by the organization                   |
| Residual risk (RR)          | R y CM Related by table                                  | $RR = (R_t - R_{t-1})$                        |

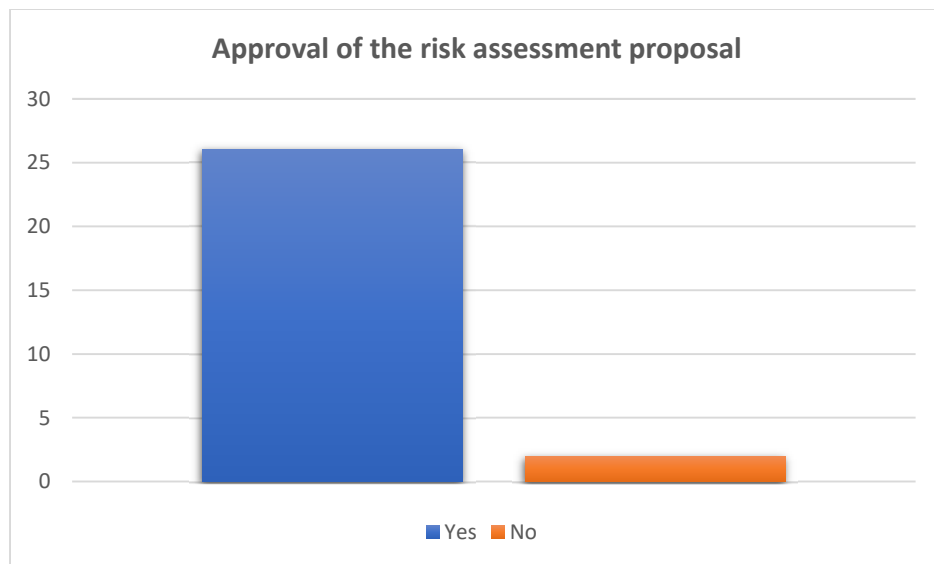

41.- If the answer is "No", indicate possible contributions

Open answer

42.- Add an open opinion of the proposal and possible recommendations

Survey link (Spanish): <https://lnkd.in/diMzzZAx>

Survey link (English): <https://lnkd.in/dMHC3hkB>
